# Supplementary material for: MS/MS-Based Molecular Networking Approach for the Detection of Aplysiatoxin-Related Compounds in Environmental Marine Cyanobacteria
Source: PubMed Central journal article supplement (PMC6315786; doi:10.3390/md16120505), 2018-12-13
Supplement: marinedrugs-16-00505-s001.pdf [file marinedrugs-16-00505-s001.pdf]

# MS/MS-Based Molecular Networking Approach for the Detection of Aplysiatoxin-Related Compounds in Environmental Marine Cyanobacteria

Chi Ying Gary Ding <sup>1</sup>, Li Mei Pang <sup>2</sup>, Zhao Xun Liang <sup>2</sup>, Kau Kiat Kelvin Goh <sup>3</sup>, Evgenia Glukhov <sup>4</sup>, William H. Gerwick <sup>4</sup> and Lik Tong Tan <sup>1,\*</sup>

<sup>1</sup> Natural Sciences and Science Education, National Institute of Education, Nanyang Technological University, 1 Nanyang Walk, Singapore 637616

<sup>2</sup> School of Biological Sciences, Nanyang Technological University, Singapore 637551

<sup>3</sup> Singapore Phenome Centre, Lee Kong Chian School of Medicine, Nanyang Technological University, Singapore 636921

<sup>4</sup> Center for Marine Biotechnology and Biomedicine, Scripps Institution of Oceanography, University of California at San Diego, La Jolla, CA 92093, USA

## SUPPLEMENTARY DATA

| <b><u>Figure</u></b> |                                                                                             | <b><u>Page</u></b> |
|----------------------|---------------------------------------------------------------------------------------------|--------------------|
| Figure S1.           | <sup>1</sup> H spectrum of debromoaplysiatoxin (1) recorded in CDCl <sub>3</sub> at 400 MHz | 2                  |

  

| <b><u>Tables</u></b> |                                                            | <b><u>Page</u></b> |
|----------------------|------------------------------------------------------------|--------------------|
| Table S1.            | Partial 16S-ITS rRNA gene match for cyanobacterial strains | 3                  |
| Table S2.            | Complete 16S rRNA sequence of cyanobacterial strains       | 3                  |

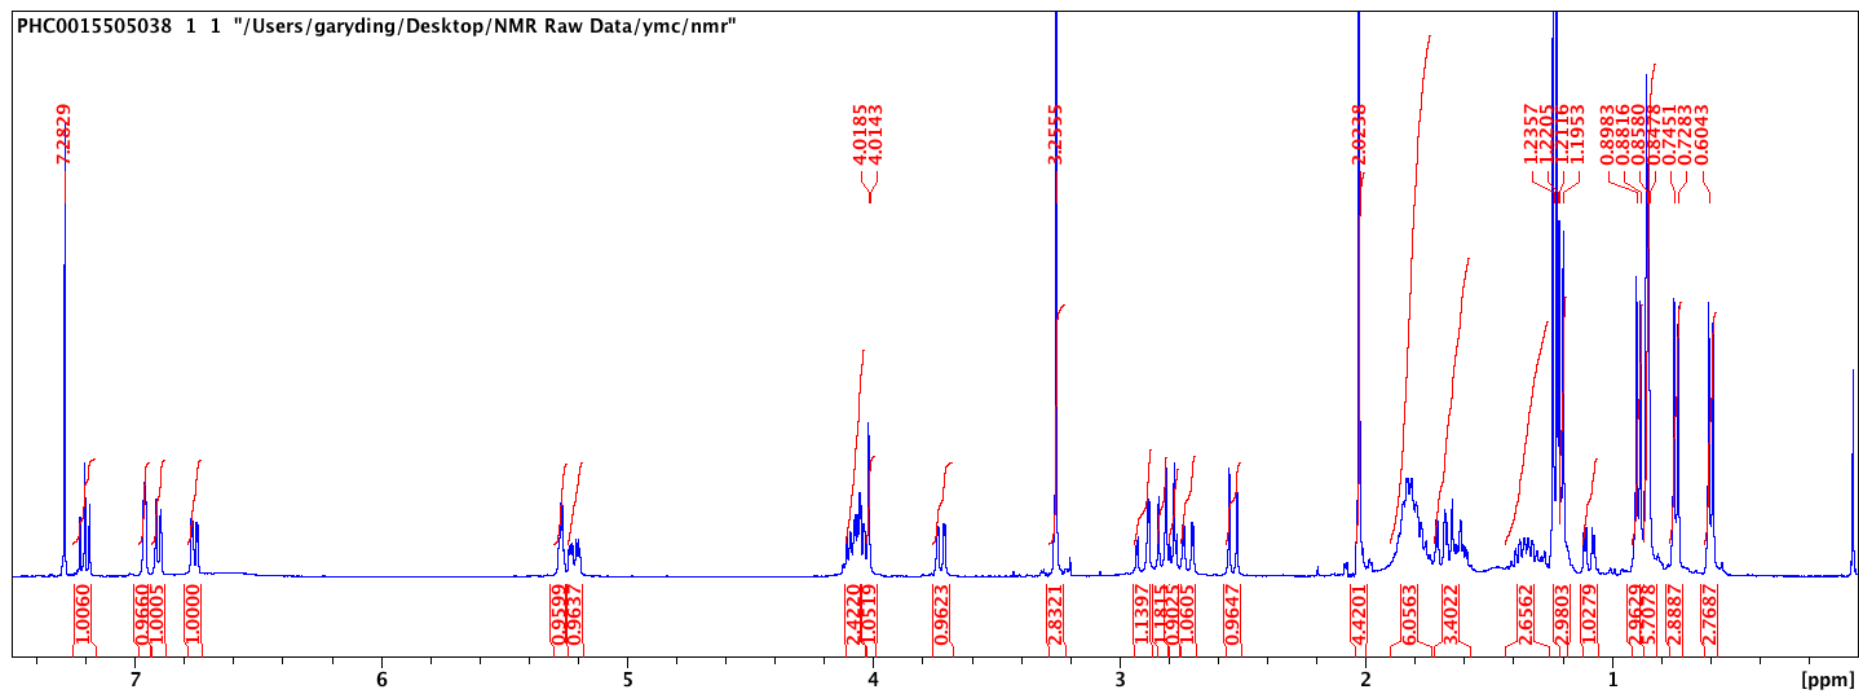

Figure S1.  $^1\text{H}$  spectrum of debromoaplysiatoxin (**1**) recorded in  $\text{CDCl}_3$  at 400 MHz

**Table S1: Cyanobacterial strains partial 16s-ITS rRNA gene and its closet homologues in the nucleotide collection database**

| Strain      | No. of bp | BLASTn closest homolog (accession#) organism | Score | Coverage/ Identity [%] |
|-------------|-----------|----------------------------------------------|-------|------------------------|
| TLT/PHB/001 | 1465      | <i>Trichodesmium erythraeum</i> IMS101       | 2529  | 1433/1465 [97.8%]      |
|             |           | <i>Trichodesmium</i> sp.                     | 2508  | 1425/1460 [97.6%]      |
|             |           | <i>Okeania</i> sp. PNG05-4                   | 2503  | 1386/1401 [98.9%]      |
|             |           | <i>Oscillatoria</i> sp. PAB-21               | 2471  | 1356/1365 [99.3%]      |
|             |           | <i>Okeania</i> sp. PNG05-4                   | 2490  | 1383/1400 [98.8%]      |
| TLT/PHC/001 | 1399      | <i>Oscillatoria</i> sp. PAB-21               | 2471  | 1356/1365 [99.3%]      |
|             |           | <i>Oscillatoria nigroviridis</i> 3LOSC       | 2471  | 1356/1365 [99.3%]      |
|             |           | <i>Okeania</i> sp. NAC8-18                   | 2412  | 1335/1349 [99.0%]      |
|             |           | <i>Oscillatoria</i> sp. PAB-21               | 2451  | 1352/1364 [99.1%]      |
| TLT/PHC/002 | 1363      | <i>Oscillatoria nigroviridis</i> 3LOSC       | 2451  | 1352/1364 [99.1%]      |
|             |           | <i>Okeania</i> sp. PNG05-4                   | 2423  | 1347/1364 [98.8%]      |
|             |           | <i>Hydrocoleum glutinosum</i> M34            | 2399  | 1331/1347 [98.8%]      |
|             |           |                                              |       |                        |

**Table S2. Complete 16s rRNA sequence of cyanobacterial samples**

**TLT/PHB/001**

CTCAGGATGAACGCTGGCGGTCTGCTTAACACATGCAAGTCGAACGGACCCTTCGGGGTTAGTGGCGGACGGGTGAGTAA  
CGCGTGAGAATCTGCCTTCAGGTCTGGGACAACAGAAGGAAACTTCTGCTAATCCCGGATGAGCCTTGGGTAAAAGATA  
AATTGCCTGGAGATGAGCTCGGTCTGATTAGCTAGTTGGTGTGGTAAAAGCATACCAAGGCAACGATCAGTAGCTGGTC  
TGAGAGGATGAGCAGCCACACTGGGACTGAGACACGGCCAGACTCCTACGGGAGGCAGCAGATGGGGAAATTTCCGCAA  
TGGGCGAAAGCCTGACGGAGCAAGACCGGTGGGGGAGGAAGGCTCTAGGGTTGTAACCCCTTTTCTTTGGGAAGAAG  
TTCTGACGGTACCAAAGGAATCAGCCTCGGCTAACTCCGTGCCAGCAGCCGGTAATACGGAGGAGGCAAGCGTTATCC  
GGAATGATTGGGCGTAAAGCGTCCGAGGTGGCCATGTAAGTCTGCTGTCAAACCCAGGGCTCAACTCTGGTCAGGCAG  
TGGAAACTACAAAGCTAGAGTCTGGTAGGGGCAAGGGAATTCCTGGCGTAGCGGTGAAATGCGTAGATTTCCGGGAAGA  
ACATCGGTGGCGAAAGCGCTTTGCTAGACCAGAAGTACACTCAGGGACGAAAGCTAGGGGAGCGAATGGGATTAGATA  
CCCCAGTAGTCTAGCCGTAACGATGGATACTAGGTGTTGCTGTATCGACCCAGGCAGTGCCGTAGCTAACCGGTTAA  
GTATCCCGCTGGGAGTACGCACGCAAGTGTGAAACTCAAAGGAATTGACGGGGCCCGCACAAAGCGGTGGAGTATGT  
GGTTTAATTCGATGCAACGCGAAGAACCTTACCAGGACTTGACATGTCGCGAATCTTAGGGAAACTTGAGAGTTGCCTCG  
GGAGCGCAACACAGGTGGTGCATGGCTGTCGTCAGCTCGTGTGAGATGTTGGGTTAAGTCCCGCAACGAGCGCAAC  
CCTCGTTTTAGTTGCCATCATAAGTTGGGCACTCTAAAGAGACTGCCGGTGACAAACCGGAGGAAGGTGGGGATGACG  
TCAAGTCAGCATGCCCTTACGTCTGGGCTACACAGTACTACAATGGTCTGGACAGAGGGTAGCCAACCCCGGAGGGC  
GAGCCAATCTAAAAACAGCCCTCAGTTTCAAGTTGAGGCTGCAACTCGCTGCATGAAGGAGGAATCGTAGTAATCG  
CAGGTACGATACTCCGTTGAATCCGTTCCCGGCCCTGTACACACCCCGTACACCATGGAAGTTGGCCACGCCCGA  
AGTCATTACTCTAACTCGTAAGAGAGGGGGATGCCGAAGGCAGGGCTGATGACTGGGGTGAAGTCGTAACAAGGTAGCC  
GTACCGAAGGTGTGGCTGGATCACCTCTT

**TLT/PHC/001**

GGACGGGTGAGTAACGCGTGAGAATCTGCCTTCAGGTCTGGGACAACAGAAGGAAACTTCTGCTAATCCCGGATGAGCCT  
TTGGGTAAAAGATAAATTGCCTGGAGATGAGCTCGCTGATTAGCTAGTTGGTGTGGTAAAAGCATACCAAGGCAACG  
ATCAGTAGCTGGTCTGAGAGGATGAGCAGCCACACTGGGACTGAGACACGGCCAGACTCCTACGGGAGGCAGCAGTGG  
GGAATTTCCGCAATGGGCGAAAGCCTGACGGAGCAAGACCGGTGGGGGAGGAAGGCTCTAGGGTTGTAACCCCTTTT  
CTTTGGGAAGAAGTTCTGACGGTACCAAAGGAATCAGCCTCGGCTAACTCCGTGCCAGCAGCCGGTAATACGGAGGA  
GGCAAGCGTTATCCGGAATGATTGGGCGTAAAGCGTCCGAGGTTGCCATGTAAGTCTGCTGTCAAACCCAGGGCTCAA  
CTCTGGTCAGGCAGTGGAAACTACAAAGCTAGAGTCTGGTAGGGGCAAGGGAATTCCTGGCGTAGCGGTGAAATGCGT  
AGATTTCCGGAAGAATCGGTGGCGAAAGCGCTTTGCTAGACCAGAAGTACACTCAGGGACGAAAGCTAGGGGAGCG  
AATGGGATTAGATAACCCAGTAGTCTAGCCGTAACGATGGATACTAGGTGTTGCCTGTATCGACCCAGGCAGTGCCGT  
AGCTAACGCGTAAAGTATCCCGCTGGGAGTACGCACGCAAGTGTGAAACTCAAAGGAATTGACGGGGGGCCCGACAA  
GCGGTGGAGTATGTGGTTAATTCGATGCAACGCGAAGAACCTTACCAGGACTTGACATGTCGCGAATCTCAGGGAAACT  
TGAGAGTGCTTCGGGAGCGCAACACAGGTGGTGCATGGCTGTCGTCAGCTCGTGTGAGATGTTGGGTTAAGTCCC  
GCAACGAGCGCAACCTCGTTTTAGTTGCCATCATAAGTTGGGCACTCTAAAGAGACTGCCGGTGACAAACCGGAGGA  
AGGTGGGGATGACGTCAAGTCAGCATGCCCTTACGTCTGGGCTACACACGTAACAATGGTCTGGACAGAGGGTAGC  
CAACCCGAGGGCGAGCCAATCTCAAACACAGCCCTCAGTTTCAAGATTGCAAGGCTGCAACTCGAGGCTGCAACTGAAAGG  
AATCGTAGTAATCGCAGGTCAGCATACTGCGGTGAATCCGTTCCCGGCCCTGTACACACCCCGTACACCATGGAAG  
GTTGGCCACGCCGAAGTCAACTCTAACTCGTAAGAGAGGGGGATGCCGAAGGCAGGGCTGATGACTGGGGTGAAGT  
CGTAACAAGGTAGCCGTACCGAAGGTGTGGCTGGATCACCTCTT

---

**TLT/PHC/002**

---

TCTGGGACAACAGAAGGAAACTTCTGCTAATCCCGGATGAGCCGTGAGGTAAAAGAGAAATTGCCTGGAG  
ATGAGCTCGCGTCTGATTAGCTAGTTGGTGTGGTAAAAGCATAACCAAGGCAACGATCAGTAGCTGGTCTGA  
GAGGATGAGCAGCCACACTGGGACTGAGACACGGCCCAGACTCCTACGGGAGGCAGCAGTGGGGAATTT  
CCGCAATGGGCGAAAGCCTGACGGAGCAAGACCGCGTGGGGGAGGAAGGCTTTAGGGTTGTAAACCCCTT  
TTCTTTGGGAAGAAGTTCTGACGGTACCAAAGGAATCAGCCTCGGCTAACTCCGTGCCAGCAGCCGCGGTA  
ATACGGAGGAGGCAAGCGTTATCCGGAATGATTGGGCGTAAAGCGTCCGCAGGTGGCCATGTAAGTCTGCT  
GTCAAAACCCAGGGCTCAACTCTGGTCAGGCAGTGGAACACTACAAAGCTAGAGTCTGGTAGGGGCAAAGG  
GAATTCCTGGCGTAGCGGTGAAATGCGTAGATTTCCGGGAAGAACATCGGTGGCGAAAGCGCTTTGCTAGAC  
CAGAACTGACACTCAGGGACGAAAGCTAGGGGAGCGAATGGGATTAGATACCCCAGTAGTCTTAGCCGTA  
AACGATGGATACTAGGTGTTGCCTGTATCGACCCAGGCAGTGCCGTAGCTAACCGTTAAGTATCCCGCCT  
GGGGAGTACGCACGCAAGTGTGAAACTCAAAGGAATTGACGGGGGCCCGCACAAAGCGGTGGAGTATGTGG  
TTTAATTCGATGCAACGCGAAGAACCCTTACCAGGACTTGACATGTCGCGAATCTTAGGGAAACTTGAGAGT  
GCCTTCGGGAGCGCAACACAGGTGGTGCATGGCTGTCGTCAGCTCGTGTGAGATGTTGGGTTAAGTC  
CCGCAACGAGCGCAACCCTCGTTTTTAGTTGCCATCATTAAAGTTGGGCACTCTAAAGAGACTGCCGGTGAC  
AAACCGGAGGAAGGTGGGGATGACGTCAAGTCAGCATGCCCCTTACGTCCTGGGCTACACACGTAATAAA  
TGGTCTGGACAGAGGGTAGCCAACCCGCGAGGGCGAGCCAATCTCAAAAACCAGGCCTCAGTTCAGATTG  
CAGGCTGCAACTCGCCTGCATGAAGGAGGAATCGCTAGTAATCGCAGGTCAGCATACTGCGGTGAATCCGT  
TCCCGGGCCTTGTACACACCGCCGTCACACCATGGAAGTTGGCCACGCCCGAAGTCATTACTTAACCCGT  
ATGGGAGGGGGATGCCGAAGGCAGGGCTGATGACTGGGGTGAAGTCGTAACAAGGTAGCCGTACCGGAAG  
GTGTGGCTGGATCACCTCCTT

---
